# Supplementary material for: The Evolution of Fluoroquinolone Resistance in Salmonella under Exposure to Sub-Inhibitory Concentration of Enrofloxacin
Source: MDPI journal article supplement (doi:10.3390/ijms222212218), 2021-11-11
Supplement: s1 [file s1]

## Supplementary Materials

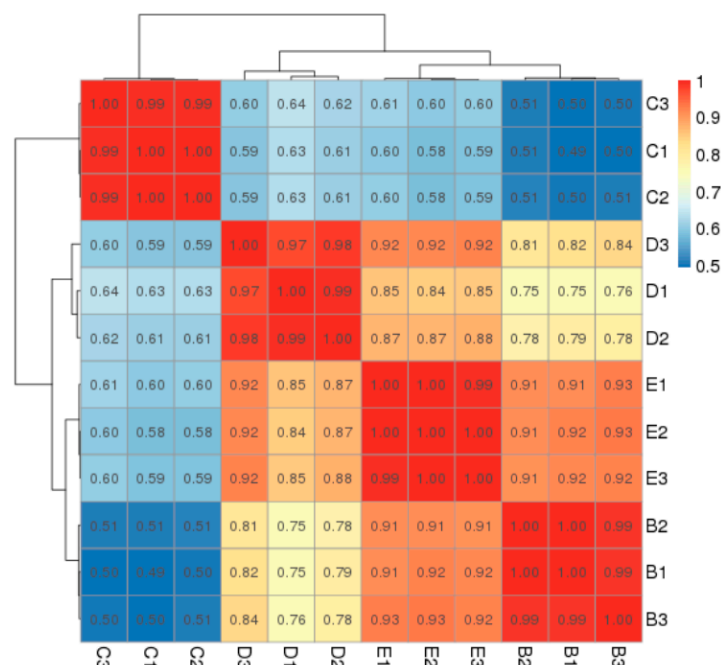

**Figure S1.** Correlation tests for the parental strain (Group B), strain 32M (1/2M) (Group C), strain 16M (1/8M) (Group D) and strain 8M (1/128M) (Group E) (triplicates in each group). The abscissa and ordinate in the figure are sample numbers. The closer the block value is to 1, the higher the similarity is.

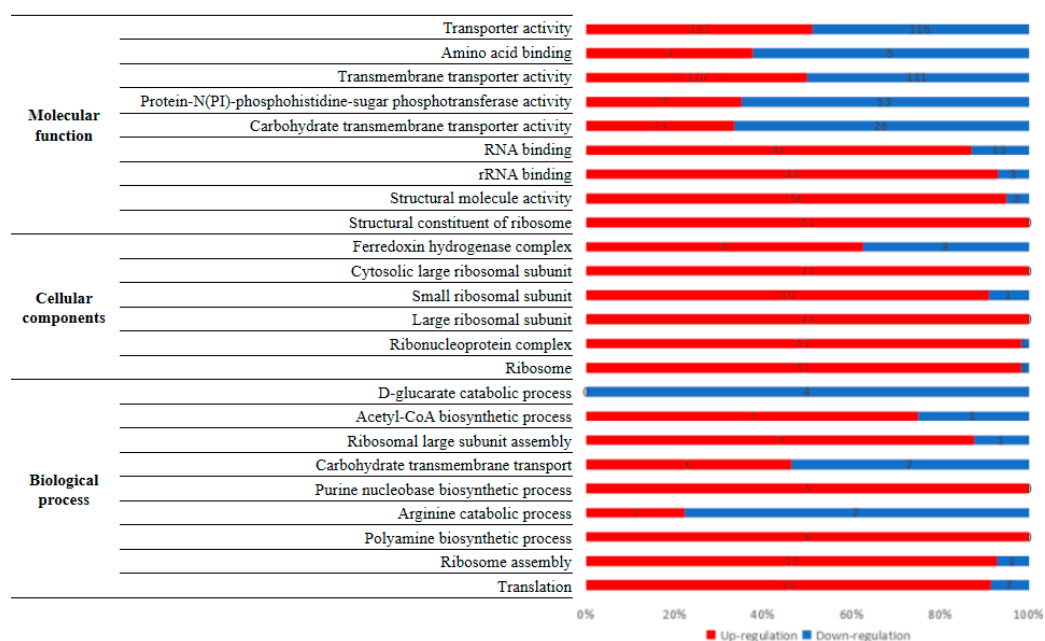

**Figure S2.** Enrichment of co-DEGs in GO Term.

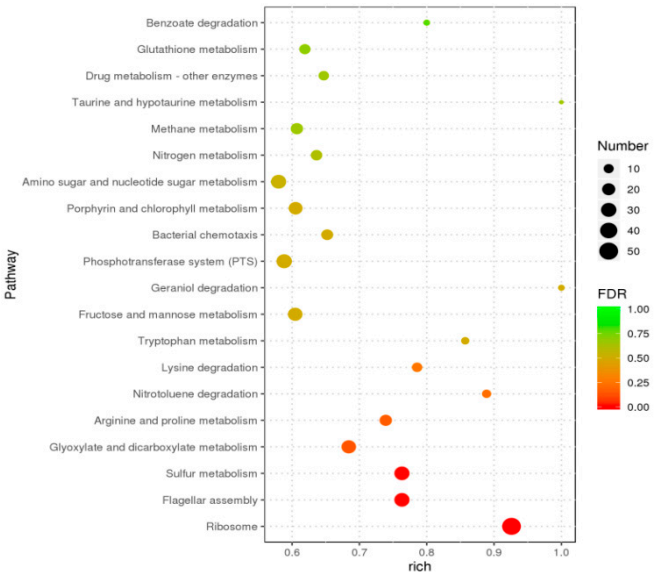

(A)

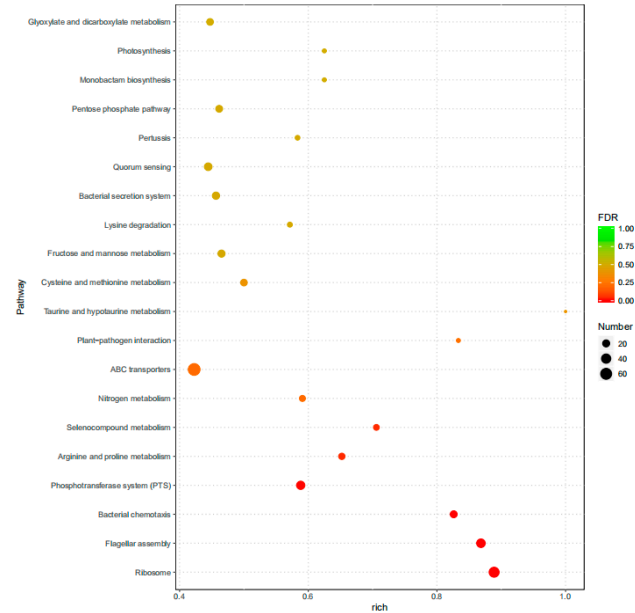

(B)

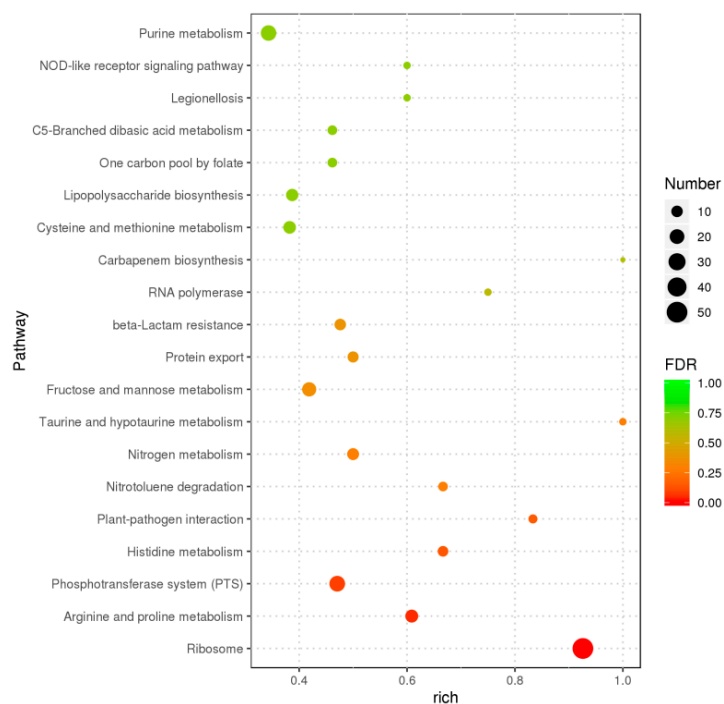

(C)

**Figure S3.** Pathway enrichment scatter plot of DEGs. (A) The top 20 KEGG pathway of B vs C group; (B) The top 20 KEGG pathway of B vs D group; (C) The top 20 KEGG pathway of B vs E group.

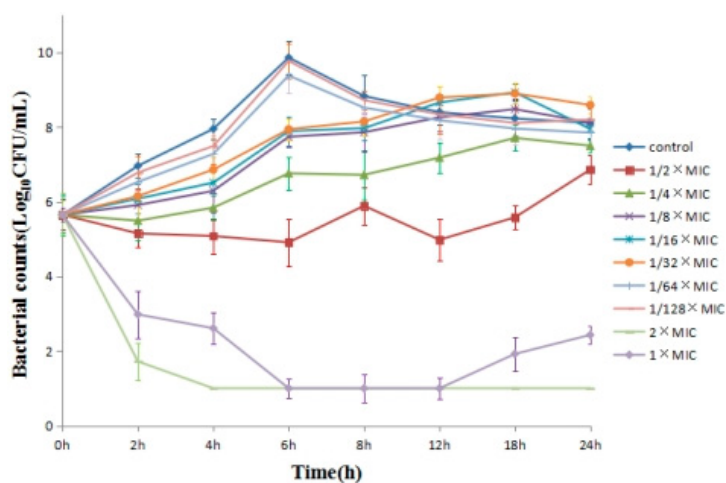

**Figure S4.** Growth curves of *Salmonella enterica* CICC 21527 in the TSB broth under sub-MIC of enrofloxacin.

**Table S1.** Primers used for identification OMPs and MDR efflux pumps of Salmonella.

| Gene name   | Primer | Sequences (5' -3' )     | Fragment size (bp) | Reference          |
|-------------|--------|-------------------------|--------------------|--------------------|
| <i>gapA</i> | gapA-F | CGCATCTCAGAACATCATC     | 130                | This study         |
|             | gapA-R | AGGTCAACAACGGATACG      |                    |                    |
| <i>ompC</i> | ompC-F | GTGGATGGTCTGGACTTC      | 177                | This study         |
|             | ompC-R | TTAGCGGTGTTGTTCTGAT     |                    |                    |
| <i>ompD</i> | ompD-F | TGTTGCCACCTACCGTAACA    | 200                | Ivan et al. (2011) |
|             | ompD-R | GGTCGCCAGGTAGATGTTGT    |                    |                    |
| <i>ompF</i> | ompF-F | GTTGAATCCTATACCGATATGG  | 300                | This study         |
|             | ompF-R | GAGTTAATGCTGTGGTTGTC    |                    |                    |
| <i>acrB</i> | acrB-F | CAATATCCGACGATTGCGC     | 194                | Kim et al. (2016)  |
|             | AcrB-R | TATCGATACCGTTCATATTCTGT |                    |                    |
| <i>acrF</i> | AcrF-F | ATTCCTACCATCGCTGTTC     | 121                | This study         |
|             | AcrF-R | CCACTATCGCATCGTCAA      |                    |                    |
| <i>emrB</i> | EmrB-F | CCTGTTGCTGAATAACTATCC   | 136                | This study         |
|             | EmrB-R | CGATGCCAATCACCAGTA      |                    |                    |
| <i>mdfA</i> | MdfA-F | CGATATGAGTAAAGGAACGG    | 266                | Sun et al. (2011)  |
|             | MdfA-R | AGCATCAGCAGTAGCCAAAGAA  |                    |                    |
| <i>mdtK</i> | MdtK-F | CGTCGGCATTGTATGGCTGT    | 94                 | Sun et al. (2011)  |
|             | MdtK-R | CACGACCTCAGGGTTGTCATTG  |                    |                    |

**Table S2.** Differently expressed genes between groups of the Co-DEGs among three groups of mutants.

| Gene name   | Fold change CvsB | Fold change DvsB | Fold change EvsB | NR                                                                                        |
|-------------|------------------|------------------|------------------|-------------------------------------------------------------------------------------------|
| <i>deaD</i> | 28.30            | 4.62             | 6.74             | DEAD/DEAH family ATP-dependent RNA helicase                                               |
| <i>purD</i> | 20.78            | 6.28             | 5.10             | Phosphoribosylamine--glycine ligase                                                       |
| <i>acrR</i> | 2.02             | -5.26            | -4.17            | TetR-family transcriptional regulator                                                     |
| <i>rhlE</i> | 20.16            | 3.85             | 6.05             | ATP-dependent RNA helicase RhlE                                                           |
| <i>rsxD</i> | 18.11            | 6.91             | 4.03             | Electron transport complex subunit RsdD                                                   |
| <i>marA</i> | 14.52            | 6.24             | 47.54            | Transcriptional activator RamA                                                            |
| <i>infB</i> | 12.44            | 3.70             | 3.09             | Initiation factor IF2-alpha                                                               |
| <i>priB</i> | 12.40            | 9.15             | 9.60             | Primosomal replication protein N                                                          |
| <i>aceF</i> | 12.40            | 2.95             | 2.22             | Pyruvate dehydrogenase complex dihydrolipoyllysine-residue acetyltransferase              |
| <i>purH</i> | 11.70            | 3.14             | 2.92             | Bifunctional phosphoribosylaminoimidazolecarboxamide formyltransferase/IMP cyclohydrolase |
| <i>rsxC</i> | 11.52            | 2.98             | 3.13             | Electron transport complex subunit RsdC                                                   |
| <i>purF</i> | 10.04            | 3.49             | 3.97             | Amidophosphoribosyltransferase                                                            |
| <i>fusA</i> | 9.80             | 5.49             | 4.45             | Elongation factor G                                                                       |
| <i>speD</i> | 9.06             | 5.88             | 4.10             | Adenosylmethionine decarboxylase                                                          |
| <i>nusA</i> | 8.83             | 2.3              | 2.54             | Transcription termination/antitermination protein NusA                                    |
| <i>purB</i> | 8.76             | 3.15             | 3.06             | Adenylosuccinate lyase                                                                    |
| <i>codA</i> | 8.37             | 3.45             | 2.38             | Cytosine deaminase                                                                        |
| <i>fis</i>  | 8.18             | 5.43             | 14.00            | DNA-binding transcriptional regulator Fis                                                 |

|             |         |       |       |                                                              |
|-------------|---------|-------|-------|--------------------------------------------------------------|
| <i>speE</i> | 7.84    | 7.16  | 4.03  | Polyamine aminopropyltransferase                             |
| <i>purL</i> | 6.94    | 3.43  | 3.92  | Phosphoribosylformylglycinamidine synthase                   |
| <i>lepB</i> | 6.52    | 3.86  | 3.66  | Signal peptidase I                                           |
| <i>rapA</i> | 5.71    | 2.05  | 2.45  | RNA polymerase-associated protein RapA                       |
| <i>gyrA</i> | 4.98    | 3.38  | 2.24  | DNA topoisomerase (ATP-hydrolyzing) subunit A                |
| <i>pnp</i>  | 4.87    | 2.99  | 2.13  | Polynucleotide phosphorylase                                 |
| <i>soxR</i> | 3.58    | -3.45 | -3.57 | Redox-sensitive transcriptional activator SoxR               |
| <i>purR</i> | 3.42    | 4.72  | 5.73  | HTH-type transcriptional repressor PurR                      |
| <i>apt</i>  | 3.40    | 7.33  | 7.78  | Adenine phosphoribosyltransferase                            |
| <i>cdd</i>  | 2.94    | -2.27 | -4.76 | Cytidine deaminase                                           |
| <i>cedA</i> | 2.30    | 2.50  | 5.81  | Cell division activator CedA                                 |
| <i>cpxP</i> | -2.17   | 2.65  | 14.14 | Cell-envelope stress modulator CpxP                          |
| <i>sodB</i> | -2.22   | 3.42  | 2.98  | Superoxide dismutase, partial                                |
| <i>phsB</i> | -5.00   | 2.60  | 2.31  | Thiosulfate reductase electron transport protein PhsB        |
| <i>fumC</i> | -6.67   | -3.57 | -2.33 | Fumarate hydratase class II                                  |
| <i>sucC</i> | -7.69   | -4.55 | -2.17 | ADP-forming succinate--CoA ligase subunit beta               |
| <i>rhaS</i> | -16.67  | 2.91  | 3.58  | HTH-type transcriptional activator RhaS                      |
| <i>aceA</i> | -25.00  | -2.17 | -2.78 | Isocitrate lyase                                             |
| <i>prpD</i> | -33.33  | -3.33 | -7.14 | Bifunctional 2-methylcitrate dehydratase/aconitate hydratase |
| <i>aceK</i> | -33.33  | -2.56 | -2.44 | Bifunctional isocitrate dehydrogenase kinase/phosphatase     |
| <i>prpC</i> | -50.00  | -4.00 | -5.56 | 2-methylcitrate synthase                                     |
| <i>prpB</i> | -100.00 | -3.70 | -5.56 | Methylisocitrate lyase                                       |
